# Supplementary material for: Intracellular microbial rhodopsin-based optogenetics to control metabolism and cell signaling
Source: Royal Society of Chemistry journal article supplement (doi:10.1039/d3cs00699a), 2024-01-01
Supplement: d3cs00699a1.pdf [file d3cs00699a1.pdf]

Table S1 Sequences of organelle-targeting signals used for MR organelle targeting

| Organelle             | Article                                    | Genetic construction                                                   | Targeting signal                                                                                                                                                                                                                                                                                                                                                                                                                                                            | Links                                                                                            |
|-----------------------|--------------------------------------------|------------------------------------------------------------------------|-----------------------------------------------------------------------------------------------------------------------------------------------------------------------------------------------------------------------------------------------------------------------------------------------------------------------------------------------------------------------------------------------------------------------------------------------------------------------------|--------------------------------------------------------------------------------------------------|
| Plasma membrane       | (Donahue <i>et al.</i> , 2021)             | pcDNA3.1-ArchT-BFP2-TS-ER <sub>ex</sub>                                | TS_ER <sub>ex</sub><br>KSRITSEGEYIPLDQIDINVGGFCYENE                                                                                                                                                                                                                                                                                                                                                                                                                         | <a href="https://www.addgene.org/123312/">https://www.addgene.org/123312/</a>                    |
|                       | (Nakao <i>et al.</i> , 2022)               | pCMV* <sub>Arch3</sub> /<br><i>RmXeR</i> _TS_eYFP_ER <sub>e</sub><br>x | TS+ER <sub>ex</sub><br>TS: KSRITSEGEYIPLDQIDINV<br>ER <sub>ex</sub> : FCYENEV                                                                                                                                                                                                                                                                                                                                                                                               | Arch3<br>(WP_092921078),<br><i>RmXeR</i><br>(WP_094549673)                                       |
|                       | (Vlasova <i>et al.</i> , 2023)             | pcDNA3.1_HA-tag_Flag-tag_Arch3/<br><i>NsXeR</i> _TS_p2a_RFP            | TS: KSRITSEGEYIPLDQIDINV<br>p2a: ATNFSLLKQAGDVEENPGP                                                                                                                                                                                                                                                                                                                                                                                                                        | <i>NsXeR</i><br>(genbank ID<br>EGQ43296)                                                         |
| Endoplasmic reticulum | (Asano <i>et al.</i> , 2018)               | ChRGR_RYR2<br>(4765-4866 a.a.)<br>_Venus                               | Mus musculus ryanodine receptor 2<br>RYR 2 (4765-4866a.a.):<br>QLVLTVGLLAVVVYLYTVVAFNFFRKFY<br>NKSEGDTPDMKCDMLTCYMFHMY<br>VGVRRAGGGIGDEIEDPAGDEYEIYRIIFI<br>TFFFVIVILLAIQGLII                                                                                                                                                                                                                                                                                               | RYR 2<br>(NM_023868.2)                                                                           |
|                       | (Eria-Oliveira A. S. <i>et al.</i> , 2023) | OLPVR1_eGFP                                                            | Inner OLPVR1 signal (unknown till now)                                                                                                                                                                                                                                                                                                                                                                                                                                      |                                                                                                  |
| Lysosomes             | (Rost <i>et al.</i> , 2015)                | pCMV_CD63(1-42a.a.)_pHluorin_Arch3_mKate_βHK_CD63(43-238a.a.)          | CD63 (CD63 antigen ( <i>Arvicanthis niloticus</i> ), 1-42 a.a.):<br>MAVEGGMKCVKFLLYVLLLAFCACAVG<br>LIAIGVAVQVVLKQA                                                                                                                                                                                                                                                                                                                                                          | pCMV-lyso-pHoenix<br><a href="https://www.addgene.org/70112/">https://www.addgene.org/70112/</a> |
|                       | (Ilyinsky <i>et al.</i> , 2023)            | pCMV_CD63(1-42a.a.)_pHluorin_NsXeR_mKate_βHK_CD63(43-238a.a.)          | βHK (potassium-transporting ATPase subunit beta ( <i>Rattus norvegicus</i> ), 2-105 a.a.):<br>AALQEKKSCSQRMAEFRQYCWNPDGTG<br>QMLGRTPARVWVWISLYAAFYVVMGTG<br>LFALCIYVLMQITIDPYTPDYQDQLKSPG<br>VTLRPDVYGERGLQISYNISENSS<br>CD63(43-238 a.a.):<br>ITHETTAGSLLPVVIIAVGAFLLVAFVGC<br>CGACKENYCLMITFAVFLSLIMLVEVAV<br>AIAGYVFRDQVKSEFNKSFRRQMMENYL<br>KDNKTATILDKLQKENNCCGASNYTDW<br>ESIPGMGKDRVPDSCCVNITAGCGNNF<br>KESTIHTQGCLTITTWLRKNVLLVAAAA<br>LGIAFVEVLGVIFSCCLVKSIRSGYEVMI |                                                                                                  |

|                   |                                                          |                                                                              |                                                                                                                                                                                                                                                                                                                                                                                                                                                                                                                                                                                                                                                                                                                 |                                                                                                             |
|-------------------|----------------------------------------------------------|------------------------------------------------------------------------------|-----------------------------------------------------------------------------------------------------------------------------------------------------------------------------------------------------------------------------------------------------------------------------------------------------------------------------------------------------------------------------------------------------------------------------------------------------------------------------------------------------------------------------------------------------------------------------------------------------------------------------------------------------------------------------------------------------------------|-------------------------------------------------------------------------------------------------------------|
| Endosomes         | (Kakegawa <i>et al.</i> , 2018)                          | ASR(D217E)_CIC5(565-816a.a.)                                                 | mouse chloride channel protein 5 Clc5(565-816 a.a.) :<br>DCITPGLYAMVGAACLGGVTRMTVSL<br>VVIMFELTGGLEYIVPLMAAAMTSKWV<br>ADALGREGIYDAHIRLNGYPFLEAKEEFA<br>HKTLAMDVMKPRRNDPLLTVLTQDSM<br>TVEDVETISETTYSGFVVSRESQRLV<br>GFVLRRLIISIENARKKQDGVVSTSIYFT<br>EHSPMPPTYPTLKLRLNILDSPFTVTD<br>LTPMEIVVDIFRKLGLRQCLVTHNGRLL<br>GIITKKDVLKHIAQMANQDPDSILFN                                                                                                                                                                                                                                                                                                                                                                   | Clc5<br>(NP_001230691.1)                                                                                    |
| Synaptic vesicles | (Rost <i>et al.</i> , 2015)                              | Synaptophysin(1-180a.a.)_pHluorin_Arch3_mKate_βHK_Synaptophysin(184-308a.a.) | Synaptophysin [Mus musculus] (1-180a.a.)<br><u>MDVVNQLVAGGQFRVVKEPLGFVKVL</u><br><u>QWVFAIFAFATCGSYTGELRLSVECAN</u><br><u>TESALNIEVEFEYPFRLHQVYFDAPSCVK</u><br><u>GGTTKIFLVGDYSSSGEFFVTVAVFAFLY</u><br><u>SMGALATYIFLQNKYRENNKGPMMDF</u><br><u>LATAVF AFMWLVSSSAWAKGLSDVKM</u><br><u>ATDPENI IKEMPMCRQ</u><br>βHK (potassium-transporting ATPase subunit beta ( <i>Rattus norvegicus</i> ), 2-105 a.a.):<br>AALQEKKSCSQRMAEFRQYCWNPD TG<br>QMLGRTPARWVWISLYAAFYVVM TG<br>LFALCIYVLMQ TIDPYTPDYQDQLKSPG<br>VTLRPDVYGERGLQISYNISENSS<br>Synaptophysin(184-308a.a.):<br>TCKELRDPVTSGLNTSVVFGFLNLV LWV<br>GNLWFVFKETGWAAPFMRAPPGAPEK<br>QPAPGDAGYDAGYGQGGYGPQDSY<br>GPQGGYQPDYGPASGGGGYGPQG<br>DYGQQGYGQQGAPTSFSNQM | pLenti-Synapsin-pHoenix-WPRE<br><a href="https://www.addgene.org/70111/">https://www.addgene.org/70111/</a> |
|                   | (Hoffmann <i>et al.</i> , 1994)                          | COX4_MTS (1-22 a.a.)_HsBR                                                    | COX4 cytochrome c oxidase subunit IV [ <i>Saccharomyces cerevisiae</i> S288C] 1-22 a. a. <u>MTS</u><br><u>MLSLRQSIRFFKPATRTLCSRR</u>                                                                                                                                                                                                                                                                                                                                                                                                                                                                                                                                                                            | NP_011328.1                                                                                                 |
| Mitochondria      | (Hara <i>et al.</i> , 2013), (Imai <i>et al.</i> , 2019) | COX8A MTS(1-29 a.a.)_dR_myc                                                  | <u>COX8A MTS</u><br>(1-29 a.a.):<br><u>MSVLTPLLLRGLTGSARRLPVPRAKIHSL</u>                                                                                                                                                                                                                                                                                                                                                                                                                                                                                                                                                                                                                                        | pCMV-myc-mito<br><a href="https://www.addgene.org/71542/">https://www.addgene.org/71542/</a>                |
|                   | (Tkatch <i>et al.</i> , 2017)                            | pcDNA3.1_4XMTS_Δ24ChR2(mut)_eYFP                                             | 4X COX8A (cytochrome c oxidase subunit 8A ( <i>Homo sapiens</i> ) <u>MTS</u> : (1-32 a.a.):<br><u>MSVLTPLLLRGLTGSARRLPVPRAKIHSL</u><br>PPE                                                                                                                                                                                                                                                                                                                                                                                                                                                                                                                                                                      | NP_004065.1                                                                                                 |
|                   | (Ernst <i>et al.</i> , 2019)                             | pcDNA3.1_ABCB10 (1-140 a.a.)_ChR2(mut)_Dendra2                               | ABCB10 (1-140 a.a., ATP-binding cassette sub-family B member 10 ( <i>Mus musculus</i> )), <u>MTS</u> :<br><u>MRAPSARALLLIPRRGPAVRAWAPAVS</u><br><u>SRIWLASEWTPLVRAWTSLIHKPGSGLR</u><br><u>FPAPLSGLPGGVGQWATSSGARRCWV</u>                                                                                                                                                                                                                                                                                                                                                                                                                                                                                        | NP_062425.1                                                                                                 |

|                                                                                                      |                                                |                                                                                             |                                                                                                                                                                                                                   |                |
|------------------------------------------------------------------------------------------------------|------------------------------------------------|---------------------------------------------------------------------------------------------|-------------------------------------------------------------------------------------------------------------------------------------------------------------------------------------------------------------------|----------------|
|                                                                                                      |                                                |                                                                                             | LAGPRAAHPLFARLQGAAATGVRDLGN<br>DSQRRPAATGRSEVWKLGLVRRPERGR<br>LSAAV                                                                                                                                               |                |
| (Berry <i>et. al.</i> , 2020),<br>(Amitrano <i>et. al.</i> , 2021),<br>(Berry <i>et. al.</i> , 2022) | pcDNA3.1_Mitofilin<br>(1-187a.a.)_<br>MAC_eYFP | Mitofilin (1-187 a.a., MICOS complex subunit Mic60 isoform X1 ( <i>Mus musculus</i> )) MTS: | MLRACQLSGVTVAAQSCLCGKFLRPL<br>RPCRRYSTSSSSGLTAGKIAGAGLLFVGG<br>GIGGTILYAKWDSHFRESVEKTIPYSDKL<br>FGMVLGSAPYTVPLPKPVQSGPLKISS<br>VSEVMKDSKLPVAQSQKTKGDTPASAA<br>STGAAQIISAAGDTLSVPAPAVQHEDTI<br>KTECPNTNEGKSTSETTEE | XP_017177312.1 |
